# Supplementary material for: Outcomes of community-based and home-based pulmonary rehabilitation for pneumoconiosis patients: a retrospective study
Source: BMC Pulm Med. 2018 Aug 9;18:133. doi: 10.1186/s12890-018-0692-7 (PMC6085700; doi:10.1186/s12890-018-0692-7)
Supplement: Supplementary file 4 — File name: HBRP.xlsx. Home based rehabilitation program. The file contains the data of treatment outcomes for patients who participated in home based pulmonary rehabilitation program. (XLSX 16 kb) [file 12890_2018_692_MOESM4_ESM.xlsx]

## Sheet: HBRP
PatientID	FEV1Pre	Hospital	OutcomeMissing	DOI	Smoking	Died	T_Program	CBRP	MRP	HBRP	HBRPpost6M	HBSP	CPDP	LTOT	CHCP	PRP	SMP	SMPRelative	RHP	RHPRelative	HLP	HLPRelative	FEV1Pre_A	FVCPre	FVCPre_A	FEV1FVCPre	CRQDyspneaPre	CRQDyspneaPost	CRQFatiquePre	CRQFatiquePost	CRQEmotionPre	CRQEmotionPost	CRQMasteryPre	CRQMasteryPost	HADAnxietyPre	HADAnxietyPost	HADDepressionPre	HADDepressionPost	KnowledgePre	KnowledgePost	SF12PCSPre	SF12PCSPost	SF12MCSPre	SF12MCSPost	@6MWTPre	@6MWTPost	BMIPre	BMIPost	D_dyspnea
1	0.4	3	0	20	3	1	43	0	0	1	0	1	4	6	9	0	15	7	0	0	0	0	0	0	0	0	2.8	1.6	2.75	2	6.6	3.4	3	4	12	15	17	20	20	21	32.9	36.1	20.79	42.2	200	324	23.88	23.25	-1.2
2	0.48	1	0	30	2	0	15	0	0	1	2	0	3	2	3	0	3	1	0	0	0	0	0	0	0	0	2.4	2.4	4.52	4.52	5.7	5.7	5.2	5.2	1	0	0	0	21	21	41.74	41.74	40.95	40.96	243	263	23.69	22.92	0
3	0.5	1	0	30	2	0	21	0	0	1	1	1	3	3	4	0	4	4	0	0	0	0	0	0	0	0	2.4	2.4	4.5	4.5	5.71	5.71	5.2	5.2	1	0	0	0	21	23	41.74	41.74	40.95	40.95	111	270	21.94	22.05	0
4	0.52	3	0	15	2	1	8	0	0	1	0	0	0	0	3	0	4	0	0	0	0	0	0.0215	0	0.0281	0.35	3.2	4.4	3.25	5.25	6.14	5.86	5	5.25	8	6	0	1	15	22	32.82	37.3	38.85	56.74	360	400	21	21	1.2
5	0.52	1	0	15	2	0	13	0	0	1	1	0	2	0	3	0	3	3	0	0	0	0	0	0	0	0	2.6	2.6	2.75	2.75	4.57	5.57	3.52	3	2	0	0	2	20	22	36.41	36.41	32.01	32.01	200	270	30.67	30.86	0
6	0.54	2	0	10	3	0	15	0	0	2	0	2	3	0	2	0	6	0	0	0	0	0	0.4	1.23	0.4	0.439	7	7	6.5	5	6.57	6.86	7	7	4	1	7	3	15	24	47.6	53.1	57.2	61.2	255	265	14.27	16.15	0
7	0.7	1	0	80	2	0	15	0	0	1	1	0	2	3	3	0	3	2	0	0	0	0	0	0	0	0	2.4	2.4	4.5	4.5	5.71	5.71	5.25	5.25	4	1	5	4	22	24	41.74	41.74	40.95	40.95	87	130	21.22	21.37	0
8	0.74	1	0	45	2	0	15	0	0	1	1	1	3	0	3	0	3	3	0	0	0	0	0.24	3.23	0.86	0.2291	3.8	4.6	3.2	4	4.7	5.1	4.2	4.5	1	1	0	0	20	21	40	42.4	38.9	41.7	200	260	19.84	19.49	0.8
9	0.83	3	0	15	2	1	9	0	0	0	0	1	1	0	1	0	6	0	0	0	0	0	0	0	0	0	6.6	7	5.75	5	6.14	6.9	6	6.5	1	0	2	6	19	20	45.07	48.24	54.11	59.43	504	522	19.77	19.81	0.4
10	0.86	3	0	40	2	0	7	0	0	1	0	0	0	0	2	0	3	1	0	0	0	0	0.37	0	0.52	0.711	2.2	5.4	3	4.75	3	4.14	4	3.5	10	1	7	14	21	22	32.17	33.15	27.07	37.63	318	312	22	21	3.2
11	0.86	1	0	100	2	0	17	0	0	1	1	0	3	3	3	0	3	3	0	0	0	0	0.28	1.31	0.34	0.6565	6	3.8	6	3.5	6	3.9	6	4	0	0	0	0	24	24	54.1	44.5	59.3	47.2	200	182	15.85	15.96	-2.2
12	0.92	1	0	55	2	0	11	0	0	1	1	0	1	0	2	0	2	2	1	0	1	0	0.37	2	0.62	0.46	5	6	5	6	5	6	5	6	1	0	0	0	23	24	53.3	54.1	51.3	59.3	156	235	19.43	19.17	0
13	0.96	1	0	70	2	0	11	0	0	1	1	0	1	2	2	0	2	2	0	0	0	0	0.32	1.93	0.52	0.4974	4.8	4.8	4.5	4.75	4	4.4	5.8	5.75	7	6	11	5	20	22	39	44.54	29	31.22	345	599	24.78	24.49	1
14	1.05	3	0	50	2	1	20	0	0	1	0	0	2	2	5	0	8	2	0	0	0	0	0.42	0	0.51	0.82	2.75	3.25	3	3.75	4	3.43	4.5	4	10	8	8	11	20	19	44.82	36.02	46.66	43.12	160	200	23	23	0.5
15	1.3	1	0	15	2	0	10	0	0	1	1	0	1	0	2	0	2	2	0	0	1	0	0	0	0	0	3.8	4.3	3.2	3.6	4.7	4.2	4.2	4.7	0	0	1	0	22	25	38	52	57	53	220	315	25.96	25.82	0.5
16	1.3	3	0	45	2	1	4	0	0	1	0	0	0	0	1	0	2	0	0	0	0	0	0	0	0	0	4.8	5	4.5	5.5	6.6	6.4	7	7	1	0	8	2	18	20	53.29	57.09	54.16	47.84	299	312	23	22	0.2
17	1.37	3	0	70	2	0	12	0	0	0	0	1	1	3	1	0	6	0	0	0	0	0	0	0	0	0	4.4	4.4	3.25	4	6.14	6.57	6	5.5	0	3	7	10	21	22	52.1	54.51	61.2	60.24	354	336	21.74	21.62	0
18	1.42	2	0	5	2	0	8	0	0	1	0	1	0	0	2	0	4	0	0	0	0	0	0.7	1.96	0.74	0.724	5.6	4.4	2.75	3.5	4.43	5.72	2.8	5.75	4	1	5	3	20	21	32.5	49.1	39.47	57.67	225	270	30	29	-1.2
19	1.54	3	0	10	3	0	24	0	0	0	0	1	0	1	2	0	4	11	1	1	1	2	0	0	0	0	4.5	3.5	6.25	5.75	6.29	6.29	5	5	3	0	0	0	21	23	44.26	52.77	45.89	59.26	401	450	23.71	23.89	-1
20	1.66	3	0	50	2	0	17	0	0	0	0	1	0	3	4	0	2	5	1	1	0	0	0	0	0	0	3.2	2.4	3.25	3.25	3.43	3.29	4.25	3	8	8	5	8	20	20	44.96	44.06	37.27	37.39	459	526	23.55	24.18	-0.8
21	1.8	3	0	10	2	0	29	0	0	1	0	0	0	0	7	0	9	6	1	0	4	1	0.98	0	0.94	0.756	3.2	2.8	3.25	4	3.71	3.71	3.25	2.5	13	6	7	5	13	21	31.62	37.36	41.87	39.58	359	430	22	22	-0.5
22	1.8	1	0	10	2	0	12	0	0	1	1	0	1	0	3	0	3	3	0	0	0	0	0.81	2.09	0.89	0.8612	2.8	3.8	2.5	3.5	2.9	3.9	2.8	4	7	5	12	9	20	22	39.1	56.6	27.5	60.8	180	186	23.2	23.29	1
23	1.94	3	0	15	2	0	14	0	0	1	0	1	1	0	4	0	7	0	0	0	0	0	0.94	0	0.72	0.7348	3	4.6	4	4.5	5.29	5.71	6	6.5	8	2	0	1	21	20	32.58	49.23	49.04	53.96	360	384	19.9	20.68	1.6
24	2.07	2	0	30	2	0	15	0	0	2	0	2	2	0	2	0	7	0	0	0	0	0	0.83	2.66	0.82	0.778	6.8	4.8	5.25	4.25	6.29	6.29	6.75	6.5	5	7	6	7	21	21	30.3	21.8	35.3	43.9	205	220	21.87	21.49	-2
25	2.15	1	0	15	2	0	11	0	0	1	0	0	2	2	2	0	2	2	0	0	0	0	0.94	2.55	0.88	0.8431	2.4	2.4	4.5	4.5	5.71	5.71	5.25	5.25	3	1	0	0	22	22	41.74	41.74	40.95	40.95	162	135	23.46	23.24	0
26	2.2	1	0	55	2	0	17	0	0	0	0	1	3	3	2	0	3	3	0	0	1	1	0	0	0	0	4.2	6.2	3.75	5.25	4.14	5.43	3.75	5.5	0	1	0	0	22	24	36.81	36.81	54.9	54.9	100	105	16.33	16.42	2
[truncated: 10 more columns]
